# Supplementary material for: Dynamic Crosslinked Injectable Mussel-Inspired Hydrogels with Adhesive, Self-Healing, and Biodegradation Properties
Source: MDPI journal article supplement (doi:10.3390/polym15081876), 2023-04-14
Supplement: s1 [file s1]

## **Highlights**

- The dynamic crosslinked hydrogel reflects injectable and self-healing properties.
- The mussel-inspired hydrogel possesses enhanced wet tissue adhesion.
- DACS hydrogel has good biocompatible and biodegradation properties.
